# Supplementary material for: Cobalt nitride as an efficient cocatalyst on CdS nanorods for enhanced photocatalytic hydrogen production in water
Source: Royal Society of Chemistry journal article supplement (doi:10.1039/c7cy00046d), 2017-01-01
Supplement: c7cy00046d1.pdf [file c7cy00046d1.pdf]

***Supporting Information***

**Cobalt Nitride as an Efficient Cocatalyst on CdS Nanorods for  
Enhanced Photocatalytic Hydrogen Production in Water**

Huanlin Chen, Daochuan Jiang, Zijun Sun, Rana Muhammad Irfan, Lei Zhang,  
Pingwu Du\*

Key Laboratory of Materials for Energy Conversion, Chinese Academy of Sciences,  
Department of Materials Science and Engineering, and the Collaborative Innovation  
Center of Chemistry for Energy Materials (*iChEM*), University of Science and  
Technology of China, No. 96 Jinzhai Road, Hefei, Anhui Province, 230026, P. R.  
China

\*To whom correspondence should be addressed

E-mail: [dupingwu@ustc.edu.cn](mailto:dupingwu@ustc.edu.cn)

Tel/Fax: 86-551-63606207

| samples                  | C1    | C2    | C3   | C4   | C5    | C6    |
|--------------------------|-------|-------|------|------|-------|-------|
| Co (wt %)                | 0.475 | 2.705 | 3.37 | 4.13 | 4.305 | 9.725 |
| Co <sub>3</sub> N (wt %) | 0.51  | 2.92  | 3.64 | 4.46 | 4.65  | 10.5  |

**Table S1.** Cobalt (Co) and Co<sub>3</sub>N contents in Co<sub>3</sub>N/CdS samples. Co contents were measured by ICP-AES and Co<sub>3</sub>N contents were calculated based on the contents of Co.

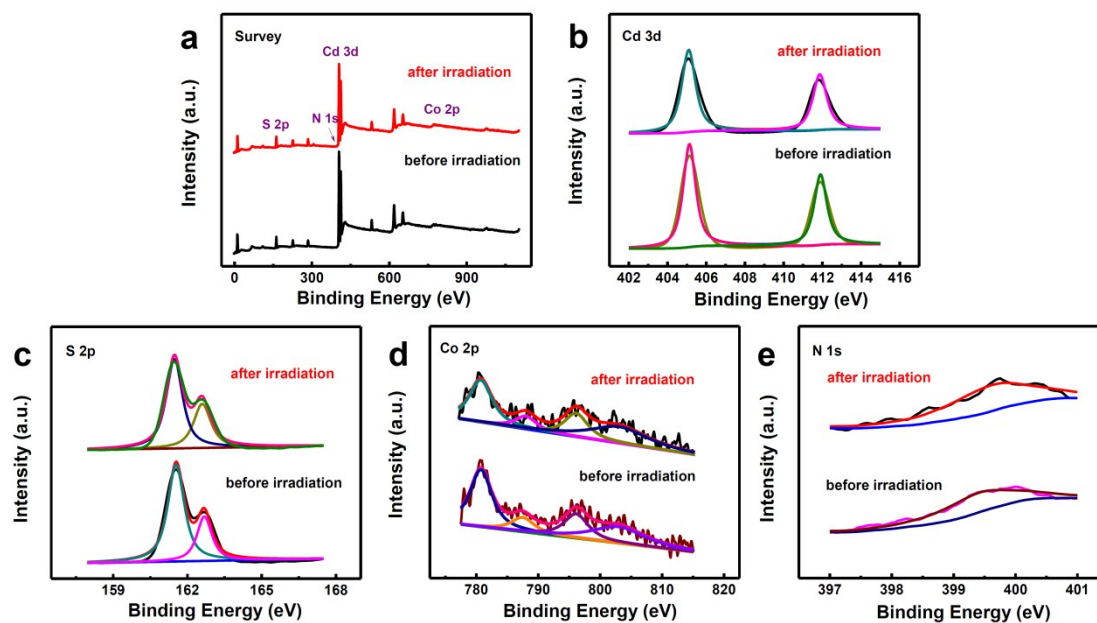

**Figure S1.** (a) XPS survey spectra and high resolution XPS spectra of (b) Cd 3d, (c) S 2p, (d) Co 2p and (e) N 1s of sample C4 before and after irradiation.
